# Supplementary material for: Transcriptome-wide identification of single-stranded RNA binding proteins
Source: Royal Society of Chemistry journal article supplement (doi:10.1039/d3sc00957b), 2023-01-01
Supplement: d3sc00957b1.xlsx [file d3sc00957b1.xlsx]

## Sheet: poly(A) RNA interactome
1462 proteins were identified by previous poly(A)-dependent enrichment methods
Accession
A0AV96
A1L020
A4D1E9
A5YKK6
A6H8Y1
A6NHQ2
O00148
O00178
O00264
O00267
O00410
O00411
O00422
O00425
O00442
O00541
O00566
O00567
O00571
O14562
O14647
O14776
O14828
O14979
O15042
O15116
O15127
O15143
O15213
O15226
O15234
O15235
O15347
O15371
O15372
O15381
O15400
O15427
O15446
O15504
O43143
O43159
O43175
O43251
O43290
O43347
O43390
O43395
O43399
O43414
O43432
O43491
O43670
O43707
O43709
O43719
O43768
O43776
O43809
O43818
O43823
O43896
O43903
O60231
O60271
O60287
O60293
O60306
O60506
O60508
O60573
O60610
O60716
O60739
O60763
O60783
O60812
O60832
O60841
O60869
O75116
O75122
O75127
O75131
O75152
O75179
O75223
O75319
O75347
O75367
O75369
O75380
O75390
O75400
O75475
O75494
O75525
O75533
O75534
O75569
O75570
O75607
O75616
O75643
O75683
O75691
O75817
O75821
O75822
O75874
O75940
O76003
O76021
O76094
O94804
O94875
O94906
O94979
O95104
O95147
O95218
O95232
O95319
O95429
O95453
O95478
O95628
O95639
O95684
O95758
O95777
O95793
O95864
O95900
O95926
O95985
P00338
P00505
P00966
P01891
P01892
P02511
P02545
P02751
P02771
P02786
P04003
P04040
P04054
P04075
P04080
P04114
P04792
P04843
P05023
P05141
P05198
P05204
P05387
P05388
P05412
P05455
P05783
P06454
P06576
P06702
P06730
P06733
P06748
P07108
P07195
P07237
P07305
P07355
P07585
P07737
P07814
P07900
P07910
P08195
P08238
P08240
P08621
P08670
P08708
P08865
P09001
P09012
P09132
P09211
P09234
P09327
P09382
P09429
P09622
P09651
P09661
P09874
P09913
P09960
P09972
P0C7Q6
P0CB38
P0CG48
P0DMV8
P0DMV9
P10316
P10412
P10515
P10599
P10620
P10636
P10645
P10809
P11021
P11137
P11142
P11171
P11182
P11387
P11388
P11498
P11586
P11940
P12270
P12956
P13010
P13489
P13639
P13667
P13693
P13798
P13861
P14324
P14618
P14625
P14678
P14866
P14868
P15170
P15311
P15531
P15559
P15880
P15924
P16070
P16401
P16402
P16403
P16615
P16989
P17096
P17480
P17509
P17844
P17931
P17987
P18031
P18077
P18124
P18583
P18615
P18621
P19338
P19525
P20042
P20073
P20290
P20618
P20774
P20810
P21127
P21291
P21333
P21399
P22087
P22234
P22314
P22626
P23193
P23246
P23284
P23396
P23528
P23588
P24043
P24752
P24928
P25398
P25440
P25705
P25789
P26038
P26196
P26368
P26373
P26447
P26583
P26599
P26639
P26641
P26651
P26885
P27635
P27695
P27797
P27816
P27824
P28799
P29084
P29375
P29401
P29558
P30040
P30048
P30050
P30086
P30101
P30405
P30414
P30419
P30876
P31146
P31153
P31483
P31689
P31937
P31942
P31943
P31946
P31948
P33240
P33316
P35221
P35241
P35268
P35269
P35544
P35555
P35579
P35611
P35637
P35659
P35998
P36542
P36578
P36873
P37108
P37802
P38159
P38646
P38919
P39019
P39023
P39687
P39748
P40227
P40429
P40925
P40926
P41214
P41567
P42166
P42167
P42285
P42677
P42694
P42696
P42704
P42765
P42766
P43243
P43307
P43897
P46013
P46087
P46109
P46199
P46459
P46776
P46777
P46778
P46779
P46781
P46782
P46783
P46821
P46937
P47813
P47914
P47974
P48200
P48357
P48444
P48634
P48651
P48735
P49327
P49368
P49406
P49411
P49419
P49588
P49590
P49591
P49674
P49750
P49755
P49756
P49761
P49792
P50395
P50454
P50502
P50579
P50914
P50991
P50995
P51114
P51116
P51398
P51513
P51608
P51858
P51911
P51991
P52272
P52292
P52298
P52597
P52756
P52758
P53597
P53618
P53999
P54105
P54277
P54577
P54886
P55010
P55036
P55060
P55072
P55081
P55084
P55145
P55196
P55209
P55259
P55263
P55265
P55769
P55795
P55884
P56181
P56182
P56270
P57721
P57723
P58107
P59045
P60002
P60228
P60468
P60842
P60866
P61011
P61081
P61088
P61221
P61247
P61254
P61313
P61326
P61353
P61513
P61604
P61619
P61764
P61927
P61956
P61978
P61981
P62081
P62191
P62241
P62244
P62249
P62258
P62263
P62266
P62269
P62277
P62280
P62306
P62308
P62310
P62312
P62314
P62316
P62318
P62328
P62424
P62495
P62633
P62701
P62750
P62753
P62805
P62826
P62829
P62841
P62847
P62851
P62854
P62857
P62861
P62888
P62899
P62906
P62910
P62913
P62917
P62937
P62942
P62979
P62993
P62995
P63104
P63165
P63173
P63220
P63241
P63244
P63279
P67809
P68036
P68104
P78316
P78332
P78344
P78346
P78362
P78371
P78527
P78563
P79522
P80723
P81605
P82664
P82673
P82675
P82912
P82914
P82921
P82933
P82970
P82979
P83731
P83881
P84077
P84090
P84098
P84103
P98175
P98179
P99999
Q00059
Q00266
Q00341
Q00577
Q00610
Q00688
Q00839
Q01081
Q01082
Q01085
Q01130
Q01780
Q01804
Q01844
Q01860
Q01995
Q02040
Q02252
Q02543
Q02790
Q02878
Q02978
Q03001
Q03701
Q04637
Q04837
Q05048
Q05193
Q05209
Q05519
Q05682
Q05707
Q06265
Q06787
Q06830
Q07020
Q07065
Q07352
Q07666
Q07954
Q07955
Q08170
Q08211
Q08752
Q08945
Q08J23
Q09161
Q09666
Q10589
Q12788
Q12849
Q12873
Q12874
Q12904
Q12905
Q12906
Q12926
Q12931
Q12955
Q12986
Q12996
Q13064
Q13084
Q13087
Q13148
Q13151
Q13206
Q13242
Q13243
Q13247
Q13263
Q13283
Q13310
Q13325
Q13347
Q13409
Q13425
Q13427
Q13428
Q13435
Q13439
Q13442
Q13523
Q13561
Q13573
Q13595
Q13601
Q13813
Q13823
Q13838
Q13868
Q13884
Q13895
Q14004
Q14011
Q14103
Q14137
Q14146
Q14147
Q14151
Q14152
Q14157
Q14204
Q14240
Q14241
Q14247
Q14258
Q14320
Q14331
Q14444
Q14493
Q14498
Q14527
Q14562
Q14576
Q14667
Q14671
Q14676
Q14683
Q14684
Q14690
Q14692
Q14694
Q14697
Q14739
Q14789
Q14847
Q14966
Q14974
Q14978
Q14CZ7
Q15020
Q15029
Q15032
Q15050
Q15056
Q15061
Q15102
Q15125
Q15149
Q15233
Q15269
Q15287
Q15291
Q15365
Q15366
Q15397
Q15417
Q15424
Q15427
Q15428
Q15434
Q15459
Q15637
Q15646
Q15654
Q15691
Q15717
Q15942
Q16181
Q16513
Q16629
Q16630
Q16658
Q16666
Q16836
Q16891
Q17RY0
Q1ED39
Q1KMD3
Q29RF7
Q2M296
Q2NL82
Q2Q1W2
Q4G0J3
Q4U2R6
Q4VXU2
Q52LJ0
Q53EP0
Q53F19
Q53R41
Q5BKY9
Q5BKZ1
Q5C9Z4
Q5F1R6
Q5H9U9
Q5JSZ5
Q5JTH9
Q5JTJ3
Q5JVS0
Q5PRF9
Q5QJE6
Q5RKV6
Q5T0F9
Q5T160
Q5T200
Q5T280
Q5T3I0
Q5T440
Q5T481
Q5T653
Q5T6F2
Q5T8P6
Q5TAX3
Q5TC82
Q5U5Q3
Q5UIP0
Q5VT52
Q5VTL8
Q5VU13
Q5VV67
Q5VYS8
Q5VZF2
Q659C4
Q66PJ3
Q68CQ4
Q69YN4
Q6AI08
Q6DKI1
Q6IBS0
Q6IN84
Q6NSI4
Q6NUQ4
Q6NW29
Q6NZI2
Q6NZY4
Q6P087
Q6P158
Q6P161
Q6P1L8
Q6P2E9
Q6P2Q9
Q6P3W6
Q6P6C2
Q6PI48
Q6PJT7
Q6PK04
Q6PKG0
Q6PUV4
Q6UN15
Q6UXG2
Q6XE24
Q6Y7W6
Q6YP21
Q6ZN04
Q6ZN17
Q6ZT89
Q6ZU64
Q6ZUT6
Q702N8
Q71RC2
Q71UM5
Q76FK4
Q7KZ85
Q7KZF4
Q7KZI7
Q7L014
Q7L0Y3
Q7L1Q6
Q7L2E3
Q7L2J0
Q7L4I2
Q7L8L6
Q7LFL8
Q7RTV0
Q7Z2T5
Q7Z2W4
Q7Z2W9
Q7Z406
Q7Z417
Q7Z478
Q7Z5Q1
Q7Z6E9
Q7Z6Z7
Q7Z739
Q7Z7H8
Q86SE5
Q86TB9
Q86TG7
Q86U38
Q86U42
Q86UE4
Q86UK7
Q86UP2
Q86UR5
Q86V81
Q86VM9
Q86VP6
Q86W50
Q86WX3
Q86XN8
Q86XP3
Q86XZ4
Q86Y13
Q86Y79
Q8IUH3
Q8IUX4
Q8IVH4
Q8IVS2
Q8IWA0
Q8IWR0
Q8IWS0
Q8IWX8
Q8IWZ3
Q8IWZ8
Q8IX01
Q8IX12
Q8IXM3
Q8IXT5
Q8IY67
Q8IY81
Q8IYB3
Q8IYB8
Q8IYD1
Q8IZ69
Q8IZ73
Q8IZH2
Q8IZL8
Q8IZQ5
Q8N163
Q8N1G4
Q8N2G6
Q8N3C0
Q8N3Z6
Q8N567
Q8N5C6
Q8N5F7
Q8N5K1
Q8N5L8
Q8N5P1
Q8N5U6
Q8N684
Q8N6N3
Q8N6U8
Q8N6Y1
Q8N726
Q8N8A6
Q8N983
Q8N9M1
Q8N9T8
Q8NAF0
Q8NAV1
Q8NBP7
Q8NBS9
Q8NC51
Q8NC60
Q8NCA5
Q8NCM8
Q8ND56
Q8NDD1
Q8NDF8
Q8NDT2
Q8NDV7
Q8NE35
Q8NE71
Q8NEF9
Q8NEJ9
Q8NEY8
Q8NEZ4
Q8NF91
Q8NHQ9
Q8NI36
Q8TA86
Q8TAD8
Q8TB72
Q8TBF4
Q8TBZ6
Q8TCS8
Q8TDD1
Q8TDN6
Q8TE67
Q8TED0
Q8TEQ6
Q8TEX9
Q8TF01
Q8WTT2
Q8WU43
Q8WU90
Q8WUA2
Q8WUB8
Q8WUH6
Q8WUM4
Q8WUQ7
Q8WV60
Q8WVM0
Q8WVV9
Q8WW12
Q8WWH5
Q8WWM7
Q8WWY3
Q8WXA9
Q8WXD2
Q8WXF0
Q8WXF1
Q8WXH0
Q92499
Q92522
Q92541
Q92576
Q92597
Q92600
Q92614
Q92615
Q92616
Q92620
Q92665
Q92667
Q92688
Q92769
Q92804
Q92834
Q92841
Q92879
Q92888
Q92900
Q92945
Q92973
Q92974
Q92979
Q93062
Q93073
Q969S3
Q969X6
Q969Z0
Q96A33
Q96A35
Q96A72
Q96AE4
Q96AG4
Q96BP2
Q96C57
Q96CM3
Q96CP2
Q96CT7
Q96CX2
Q96D46
Q96DH6
Q96DI7
Q96E39
Q96EL2
Q96EP5
Q96EU6
Q96EV2
Q96EY4
Q96EY7
Q96FQ6
Q96G46
Q96GQ7
Q96HC4
Q96HN2
Q96HR8
Q96I24
Q96I51
Q96IP4
Q96IZ0
Q96K80
Q96KC8
Q96KP4
Q96KR1
Q96MU7
Q96MW1
Q96P11
Q96PK6
Q96PM9
Q96PU8
Q96PZ0
Q96Q15
Q96QC0
Q96QD9
Q96QE5
Q96QR8
Q96RP9
Q96SB4
Q96SD1
Q96SI9
Q96T21
Q96T37
Q96T58
Q99439
Q99442
Q99459
Q99497
Q99543
Q99551
Q99572
Q99575
Q99590
Q99598
Q99613
Q99700
Q99714
Q99729
Q99733
Q99798
Q99848
Q99873
Q99956
Q9BQ04
Q9BQ39
Q9BQ48
Q9BQ52
Q9BQ67
Q9BQ75
Q9BQC6
Q9BQG0
Q9BRD0
Q9BRJ2
Q9BRJ6
Q9BRJ7
Q9BRL6
Q9BRP8
Q9BRT6
Q9BRU9
Q9BRZ2
Q9BSC4
Q9BSD7
Q9BSH4
Q9BTC0
Q9BTD8
Q9BTL3
Q9BU23
Q9BU76
Q9BUJ2
Q9BUL9
Q9BUQ8
Q9BUT9
Q9BVI4
Q9BVJ6
Q9BVP2
Q9BWE0
Q9BWF3
Q9BX40
Q9BX46
Q9BX66
Q9BXJ9
Q9BXP5
Q9BXS6
Q9BXY0
Q9BY67
Q9BY77
Q9BYC8
Q9BYC9
Q9BYD1
Q9BYD2
Q9BYD3
Q9BYD6
Q9BYG3
Q9BYJ9
Q9BYK8
Q9BYN8
Q9BZE1
Q9BZE4
Q9BZI7
Q9BZJ0
Q9BZZ5
Q9C0B0
Q9C0C2
Q9C0C9
Q9C0J8
Q9GZR2
Q9GZR7
Q9GZT3
Q9GZY0
Q9GZZ1
Q9H000
Q9H074
Q9H095
Q9H0A0
Q9H0D6
Q9H0G5
Q9H0J9
Q9H0L4
Q9H0S4
Q9H0Z9
Q9H1E3
Q9H2U1
Q9H2Y7
Q9H307
Q9H3H3
Q9H3Q1
Q9H444
Q9H501
Q9H583
Q9H5H4
Q9H5Q4
Q9H694
Q9H6F5
Q9H6R0
Q9H6R4
Q9H6S0
Q9H6T0
Q9H7B2
Q9H7E2
Q9H825
Q9H8H0
Q9H8H2
Q9H972
Q9H9G7
Q9H9J2
Q9H9J4
Q9H9L3
Q9H9Y2
Q9HA38
Q9HAV4
Q9HB71
Q9HBD1
Q9HBE1
Q9HBL0
Q9HC35
Q9HC36
Q9HCD5
Q9HCE1
Q9HCJ3
Q9HCM7
Q9NNW5
Q9NP64
Q9NP73
Q9NP81
Q9NP92
Q9NPE2
Q9NQ29
Q9NQ50
Q9NQ55
Q9NQ94
Q9NQC3
Q9NQG5
Q9NQZ2
Q9NR30
Q9NR56
Q9NRA8
Q9NRC6
Q9NRR4
Q9NRW3
Q9NRX1
Q9NS39
Q9NSD9
Q9NSI8
Q9NTK5
Q9NTZ6
Q9NUD5
Q9NUK0
Q9NUL3
Q9NUL5
Q9NUL7
Q9NUP9
Q9NUQ6
Q9NUU7
Q9NV06
Q9NV31
Q9NVA2
Q9NVN8
Q9NVP1
Q9NVS2
Q9NVU7
Q9NVV4
Q9NW13
Q9NW64
Q9NWH9
Q9NWU5
Q9NX05
Q9NX07
Q9NX20
Q9NX24
Q9NX58
Q9NX63
Q9NXG2
Q9NXH9
Q9NXW2
Q9NXZ2
Q9NY12
Q9NY61
Q9NY93
Q9NYF8
Q9NYK5
Q9NYL2
Q9NYY8
Q9NZ01
Q9NZ45
Q9NZB2
Q9NZI8
Q9NZM5
Q9P013
Q9P015
Q9P031
Q9P0M9
Q9P258
Q9P275
Q9P287
Q9P2E3
Q9P2E9
Q9P2K5
Q9P2M7
Q9P2N5
Q9P2T1
Q9P2W9
Q9UBM7
Q9UBS9
Q9UBU9
Q9UBV8
Q9UEY8
Q9UGI8
Q9UGP8
Q9UGR2
Q9UGU0
Q9UGY1
Q9UH17
Q9UHA3
Q9UHB6
Q9UHB7
Q9UHB9
Q9UHC7
Q9UHR5
Q9UHX1
Q9UI17
Q9UIG0
Q9UII4
Q9UJA5
Q9UJC3
Q9UJU6
Q9UJV8
Q9UJV9
Q9UK59
Q9UK61
Q9UKA9
Q9UKD2
Q9UKJ3
Q9UKM9
Q9UKV3
Q9UKV8
Q9UKY7
Q9UL18
Q9UL40
Q9ULP0
Q9ULR0
Q9ULW0
Q9ULW3
Q9ULX6
Q9UMX0
Q9UMY1
Q9UN36
Q9UN86
Q9UNP9
Q9UNQ2
Q9UNW9
Q9UNX4
Q9UNZ2
Q9UPN3
Q9UPN6
Q9UPQ9
Q9UPT8
Q9UPU9
Q9UQ35
Q9UQ80
Q9Y221
Q9Y223
Q9Y224
Q9Y237
Q9Y262
Q9Y285
Q9Y2H6
Q9Y2K5
Q9Y2Q9
Q9Y2R4
Q9Y2R9
Q9Y2S6
Q9Y2T7
Q9Y2V2
Q9Y2W1
Q9Y2W2
Q9Y2X3
Q9Y2Z2
Q9Y2Z4
Q9Y314
Q9Y324
Q9Y333
Q9Y383
Q9Y388
Q9Y3A2
Q9Y3A4
Q9Y3A5
Q9Y3B4
Q9Y3B7
Q9Y3B9
Q9Y3C1
Q9Y3D5
Q9Y3D9
Q9Y3F4
Q9Y3I0
Q9Y3T9
Q9Y3U8
Q9Y3X0
Q9Y3Y2
Q9Y421
Q9Y490
Q9Y4B5
Q9Y4C8
Q9Y4F3
Q9Y4I1
Q9Y4P3
Q9Y4W2
Q9Y4Z0
Q9Y520
Q9Y580
Q9Y5A9
Q9Y5B9
Q9Y5G4
Q9Y5J1
Q9Y5K5
Q9Y5M8
Q9Y5S9
Q9Y606
Q9Y624
Q9Y678
Q9Y6A4
Q9Y6E2
Q9Y6G3
Q9Y6G9
Q9Y6M1
Q9Y6V7
Q9Y6Y8
Q9H089
Q9NXF1
Q9Y295
O94874
Q9BY44
P46940
P14923
Q13835
Q96G21
Q9HAU5
Q14980
O43148
P78347
Q5SY16
Q9Y2P8
P49207
Q9H7N4
P04083
P04406
P32969
Q13123
Q86VY4
Q9BQE3
P10155
Q02413
Q9Y446
O60264
P08579
P31944
Q08554
Q14839
Q6P5R6
Q9Y6K5
O15091
P05109
P23771
P25311
P29372
Q12899
Q8IV48
Q9NZT1
P31151
P42771
P56537
Q13765
Q6SJ93
Q71UI9
Q9BXR0
O95347
P11413
P62987
P63162
Q13501
A1X283
A2VDJ0
O15050
O60333
O60524
P0DI83
P12268
P51648
Q14674
Q6NXT2
Q8IVF2
Q8IZT6
Q8N3Z3
Q8TAE8
Q92540
Q92552
Q96GC5
Q9BY12
Q9H7E9
Q9P2D0
Q9UG63
Q9UN81
