# Supplementary material for: Transcriptome-wide identification of single-stranded RNA binding proteins
Source: Royal Society of Chemistry journal article supplement (doi:10.1039/d3sc00957b), 2023-01-01
Supplement: d3sc00957b2.xlsx [file d3sc00957b2.xlsx]

## Sheet: RNA interactome
5020 proteins were identified by previous poly(A)-independent enrichment methods
Accession
A0AV96
A0AVT1
A1L020
A1XBS5
A2A288
A2AJT9
A2RTX5
A2RU48
A2RUB1
A2RUC4
A2VDJ0
A4D1E9
A4D2B0
A5YKK6
A6H8Y1
A6NC42
A6NDE4
A6NDY0
A6NEQ0
A6NER0
A6NFN3
A6NFY4
A6NGQ2
A6NHQ2
A6NHQ4
A6NIX2
A6NIZ1
A6NKT7
A6NMK7
A6NMX2
A6NNA2
A6PVI3
A6PVS8
A7MD48
A8K979
A8MPP1
A8MTY0
A8MWD9
A8MWY0
A9UHW6
B2RPK0
B2RXH8
B5MCY1
B5ME19
B7ZW38
C9JE40
C9JRZ8
O00115
O00139
O00148
O00178
O00232
O00257
O00264
O00267
O00303
O00400
O00408
O00410
O00411
O00418
O00422
O00425
O00442
O00458
O00472
O00488
O00505
O00507
O00541
O00560
O00566
O00567
O00571
O00584
O00629
O14492
O14524
O14556
O14562
O14602
O14647
O14686
O14715
O14717
O14730
O14744
O14745
O14746
O14776
O14787
O14802
O14828
O14829
O14836
O14879
O14893
O14948
O14958
O14979
O14980
O15015
O15037
O15042
O15047
O15056
O15091
O15105
O15116
O15127
O15143
O15160
O15198
O15213
O15226
O15234
O15235
O15318
O15347
O15355
O15371
O15372
O15381
O15382
O15397
O15400
O15427
O15446
O15455
O15481
O15484
O15504
O15514
O15520
O15523
O15541
O15550
O43143
O43148
O43159
O43167
O43172
O43175
O43189
O43237
O43251
O43252
O43290
O43310
O43313
O43324
O43347
O43379
O43390
O43395
O43399
O43414
O43422
O43426
O43432
O43447
O43464
O43491
O43541
O43583
O43592
O43660
O43670
O43687
O43707
O43708
O43709
O43716
O43719
O43734
O43768
O43776
O43809
O43818
O43820
O43823
O43824
O43847
O43852
O43865
O43896
O43903
O60220
O60231
O60264
O60271
O60287
O60292
O60293
O60294
O60306
O60336
O60341
O60381
O60506
O60508
O60518
O60522
O60563
O60566
O60573
O60583
O60610
O60662
O60716
O60739
O60763
O60765
O60783
O60812
O60828
O60832
O60841
O60869
O60870
O60885
O60930
O60936
O60942
O75030
O75052
O75064
O75113
O75116
O75122
O75127
O75129
O75131
O75150
O75152
O75153
O75161
O75175
O75179
O75223
O75290
O75293
O75319
O75323
O75324
O75347
O75367
O75369
O75380
O75382
O75390
O75394
O75400
O75414
O75420
O75460
O75467
O75475
O75494
O75525
O75526
O75530
O75533
O75534
O75554
O75563
O75569
O75570
O75594
O75603
O75607
O75608
O75616
O75643
O75648
O75683
O75691
O75717
O75718
O75792
O75794
O75817
O75818
O75820
O75821
O75822
O75874
O75879
O75914
O75916
O75934
O75940
O76003
O76021
O76094
O76099
O77932
O94762
O94763
O94804
O94818
O94829
O94855
O94875
O94887
O94906
O94913
O94925
O94979
O94992
O95059
O95071
O95104
O95147
O95149
O95197
O95202
O95218
O95232
O95258
O95319
O95340
O95363
O95373
O95389
O95391
O95400
O95429
O95453
O95466
O95478
O95503
O95544
O95602
O95620
O95625
O95628
O95639
O95684
O95707
O95747
O95751
O95758
O95777
O95786
O95793
O95864
O95900
O95905
O95926
O95985
O96013
O96028
O96033
P00156
P00338
P00374
P00387
P00505
P00748
P00915
P00966
P00973
P01034
P01127
P01891
P01892
P02461
P02511
P02545
P02749
P02751
P02771
P02786
P02792
P02814
P03950
P03973
P04003
P04040
P04054
P04075
P04080
P04083
P04114
P04150
P04271
P04406
P04637
P04792
P04798
P04818
P04843
P05023
P05141
P05165
P05181
P05198
P05204
P05386
P05387
P05388
P05412
P05423
P05455
P05783
P06454
P06576
P06702
P06730
P06733
P06748
P07108
P07195
P07237
P07288
P07305
P07339
P07355
P07585
P07737
P07814
P07900
P07910
P07992
P07998
P08183
P08195
P08218
P08238
P08240
P08567
P08579
P08621
P08670
P08708
P08865
P09001
P09012
P09016
P09104
P09110
P09132
P09211
P09234
P09237
P09327
P09382
P09429
P09525
P09543
P09622
P09651
P09661
P09681
P09874
P09884
P09913
P09914
P09960
P09972
P0C024
P0C0S8
P0C7P1
P0C7Q6
P0C7T5
P0CAP2
P0CB38
P0CG48
P0CJ79
P0CW24
P0DJD3
P0DJD4
P0DMR1
P0DMV8
P0DMV9
P0DN76
P10074
P10153
P10155
P10276
P10316
P10412
P10515
P10523
P10599
P10620
P10636
P10645
P10809
P10827
P11021
P11137
P11142
P11168
P11171
P11182
P11309
P11387
P11388
P11474
P11487
P11498
P11509
P11511
P11586
P11831
P11940
P12081
P12268
P12270
P12273
P12724
P12814
P12956
P13010
P13489
P13639
P13667
P13693
P13798
P13861
P13929
P14324
P14415
P14618
P14625
P14678
P14866
P14868
P15170
P15311
P15531
P15559
P15880
P15924
P15976
P16050
P16070
P16104
P16284
P16383
P16401
P16402
P16403
P16435
P16615
P16989
P17020
P17026
P17096
P17097
P17480
P17509
P17735
P17844
P17931
P17947
P17987
P18031
P18077
P18124
P18583
P18615
P18621
P18754
P19338
P19387
P19388
P19474
P19525
P19532
P19544
P19784
P19878
P20042
P20061
P20073
P20290
P20618
P20774
P20810
P20827
P20839
P21127
P21128
P21291
P21333
P21399
P21741
P22079
P22087
P22090
P22234
P22314
P22492
P22626
P23193
P23246
P23284
P23381
P23396
P23471
P23528
P23588
P24043
P24534
P24557
P24752
P24928
P25311
P25398
P25440
P25490
P25705
P25786
P25789
P26022
P26038
P26196
P26358
P26368
P26373
P26378
P26447
P26583
P26599
P26639
P26640
P26641
P26651
P26885
P27144
P27361
P27635
P27695
P27797
P27816
P27824
P28325
P28715
P28799
P29083
P29084
P29144
P29322
P29375
P29401
P29558
P29692
P29728
P30039
P30040
P30042
P30043
P30048
P30050
P30086
P30101
P30405
P30414
P30419
P30566
P30876
P31146
P31153
P31371
P31483
P31689
P31937
P31941
P31942
P31943
P31946
P31948
P31994
P32456
P32754
P32969
P33240
P33316
P34096
P34810
P34896
P35221
P35241
P35244
P35251
P35268
P35269
P35270
P35544
P35548
P35555
P35579
P35611
P35637
P35658
P35659
P35716
P35789
P35998
P36222
P36542
P36578
P36639
P36776
P36873
P36915
P36954
P36969
P37108
P37198
P37231
P37802
P38159
P38398
P38432
P38646
P38919
P38935
P39019
P39023
P39687
P39748
P40189
P40227
P40429
P40925
P40926
P41091
P41214
P41223
P41227
P41238
P41250
P41252
P41567
P42166
P42167
P42285
P42568
P42677
P42685
P42694
P42696
P42704
P42765
P42766
P42771
P43234
P43243
P43307
P43897
P45880
P46013
P46060
P46063
P46087
P46095
P46109
P46199
P46459
P46776
P46777
P46778
P46779
P46781
P46782
P46783
P46821
P46937
P47813
P47897
P47902
P47914
P47974
P48200
P48357
P48382
P48426
P48431
P48436
P48444
P48506
P48634
P48643
P48651
P48735
P49023
P49207
P49327
P49366
P49368
P49406
P49407
P49411
P49419
P49458
P49588
P49589
P49590
P49591
P49593
P49642
P49674
P49711
P49750
P49755
P49756
P49759
P49760
P49761
P49770
P49773
P49790
P49792
P49842
P49915
P50395
P50454
P50502
P50552
P50579
P50616
P50750
P50876
P50914
P50991
P50995
P51003
P51114
P51116
P51398
P51452
P51513
P51553
P51608
P51649
P51816
P51825
P51826
P51843
P51858
P51884
P51911
P51991
P52272
P52292
P52294
P52298
P52434
P52435
P52594
P52597
P52736
P52738
P52746
P52747
P52756
P52758
P52815
P52943
P52948
P52952
P53041
P53597
P53618
P53674
P53803
P53999
P54098
P54105
P54132
P54136
P54198
P54252
P54253
P54259
P54277
P54577
P54886
P55010
P55036
P55039
P55060
P55072
P55075
P55081
P55084
P55145
P55196
P55198
P55199
P55209
P55259
P55263
P55265
P55318
P55327
P55769
P55795
P55822
P55854
P55884
P56181
P56182
P56192
P56270
P56381
P56385
P56537
P56555
P57052
P57071
P57081
P57678
P57721
P57723
P57771
P57772
P58004
P58107
P58317
P58557
P59045
P59817
P60002
P60153
P60228
P60321
P60323
P60468
P60842
P60866
P60900
P61011
P61081
P61088
P61129
P61218
P61221
P61247
P61254
P61313
P61326
P61353
P61513
P61571
P61572
P61573
P61574
P61575
P61576
P61578
P61579
P61604
P61619
P61764
P61927
P61956
P61964
P61970
P61978
P61981
P62070
P62081
P62191
P62241
P62244
P62249
P62258
P62263
P62266
P62269
P62273
P62277
P62280
P62304
P62306
P62308
P62310
P62312
P62314
P62316
P62318
P62328
P62424
P62487
P62495
P62633
P62701
P62750
P62753
P62805
P62826
P62829
P62841
P62847
P62851
P62854
P62857
P62861
P62875
P62888
P62891
P62899
P62906
P62910
P62913
P62917
P62937
P62942
P62945
P62979
P62987
P62993
P62995
P63104
P63128
P63162
P63165
P63167
P63173
P63220
P63241
P63244
P63272
P63279
P67809
P68036
P68104
P68363
P68371
P68400
P78316
P78332
P78344
P78345
P78346
P78362
P78371
P78406
P78527
P78559
P78563
P79522
P80217
P80723
P81605
P82650
P82663
P82664
P82673
P82675
P82909
P82912
P82914
P82921
P82930
P82932
P82933
P82970
P82979
P83105
P83111
P83369
P83731
P83876
P83881
P84022
P84077
P84090
P84098
P84103
P86791
P98175
P98179
P98194
P99999
Q00059
Q00266
Q00341
Q00577
Q00610
Q00688
Q00839
Q00987
Q01081
Q01082
Q01085
Q01105
Q01130
Q01780
Q01804
Q01844
Q01860
Q01995
Q02040
Q02241
Q02252
Q02539
Q02543
Q02750
Q02790
Q02809
Q02878
Q02978
Q03001
Q03111
Q03164
Q03188
Q03701
Q03989
Q04637
Q04837
Q04917
Q05048
Q05193
Q05209
Q05519
Q05639
Q05682
Q05707
Q05823
Q06124
Q06210
Q06265
Q06413
Q06547
Q06787
Q06830
Q07020
Q07021
Q07065
Q07352
Q07666
Q07687
Q07889
Q07890
Q07954
Q07955
Q08043
Q08170
Q08211
Q08257
Q08431
Q08495
Q08752
Q08945
Q08J23
Q09161
Q09472
Q09666
Q0VGE8
Q0WX57
Q10472
Q10570
Q10589
Q12788
Q12796
Q12816
Q12849
Q12872
Q12873
Q12874
Q12888
Q12894
Q12899
Q12904
Q12905
Q12906
Q12908
Q12926
Q12931
Q12955
Q12972
Q12986
Q12996
Q13015
Q13049
Q13064
Q13084
Q13087
Q13117
Q13123
Q13144
Q13148
Q13151
Q13155
Q13206
Q13242
Q13243
Q13247
Q13257
Q13263
Q13283
Q13287
Q13310
Q13325
Q13347
Q13352
Q13395
Q13405
Q13409
Q13416
Q13421
Q13425
Q13427
Q13428
Q13434
Q13435
Q13439
Q13442
Q13472
Q13485
Q13523
Q13526
Q13541
Q13542
Q13555
Q13561
Q13573
Q13595
Q13601
Q13630
Q13686
Q13769
Q13813
Q13823
Q13825
Q13838
Q13868
Q13884
Q13888
Q13889
Q13895
Q13901
Q14004
Q14011
Q14032
Q14103
Q14106
Q14123
Q14137
Q14146
Q14147
Q14149
Q14151
Q14152
Q14154
Q14157
Q14166
Q14191
Q14197
Q14201
Q14204
Q14232
Q14240
Q14241
Q14247
Q14249
Q14258
Q14296
Q14320
Q14331
Q14410
Q14442
Q14444
Q14451
Q14493
Q14498
Q14527
Q14562
Q14576
Q14667
Q14669
Q14671
Q14676
Q14683
Q14684
Q14686
Q14690
Q14692
Q14694
Q14697
Q14699
Q14739
Q14764
Q14789
Q147X3
Q14847
Q14919
Q14929
Q14966
Q14974
Q14978
Q149M9
Q14CZ7
Q15004
Q15020
Q15022
Q15024
Q15029
Q15031
Q15032
Q15038
Q15040
Q15046
Q15050
Q15056
Q15061
Q15102
Q15125
Q15139
Q15149
Q15185
Q15233
Q15269
Q15287
Q15291
Q15361
Q15365
Q15366
Q15393
Q15397
Q15415
Q15417
Q15424
Q15427
Q15428
Q15434
Q15459
Q15477
Q15527
Q15545
Q15572
Q15573
Q15631
Q15633
Q15637
Q15645
Q15646
Q15649
Q15650
Q15654
Q15691
Q15695
Q15696
Q15717
Q15785
Q15796
Q15797
Q15813
Q15910
Q15942
Q16181
Q16206
Q16222
Q16342
Q16513
Q16540
Q16543
Q16560
Q16576
Q16587
Q16594
Q16600
Q16629
Q16630
Q16637
Q16658
Q16666
Q16740
Q16762
Q16777
Q16836
Q16875
Q16890
Q16891
Q17RB0
Q17RN3
Q17RY0
Q1ED39
Q1KMD3
Q29RF7
Q2M296
Q2MKA7
Q2NL82
Q2Q1W2
Q2QGD7
Q2TAA2
Q2TB10
Q2TB18
Q2TBE0
Q2VIR3
Q2VPK5
Q32MZ4
Q32NC0
Q32P41
Q32P51
Q3I5F7
Q3KNT7
Q3MHD2
Q3MIT2
Q3YEC7
Q3ZCQ8
Q3ZCW2
Q460N5
Q499Z4
Q49A26
Q49AM1
Q49AM3
Q49MI3
Q4G0J3
Q4G0M1
Q4G176
Q4J6C6
Q4KMP7
Q4L235
Q4U2R6
Q4VXA5
Q4VXU2
Q504Q3
Q52LJ0
Q53EL6
Q53EP0
Q53ET0
Q53EV4
Q53F19
Q53GL0
Q53GS7
Q53GS9
Q53H47
Q53H54
Q53H82
Q53HI1
Q53R41
Q53T94
Q53TQ3
Q569K4
Q56P03
Q587J7
Q587J8
Q58A45
Q59GN2
Q5BKU9
Q5BKY9
Q5BKZ1
Q5BN46
Q5C9Z4
Q5D0E6
Q5D1E8
Q5F1R6
Q5GAN3
Q5GAN4
Q5GAN6
Q5GLZ8
Q5H913
Q5H9E4
Q5H9K5
Q5H9R7
Q5H9S7
Q5H9U9
Q5HYM0
Q5JNZ5
Q5JPH6
Q5JPI9
Q5JQF8
Q5JSJ4
Q5JSQ8
Q5JSZ5
Q5JTH9
Q5JTJ3
Q5JTZ9
Q5JVF3
Q5JVS0
Q5MNZ9
Q5PRF9
Q5QJE6
Q5QNW6
Q5RKV6
Q5RL73
Q5SSJ5
Q5ST30
Q5SXH7
Q5SY16
Q5SZQ8
Q5T035
Q5T0F9
Q5T160
Q5T1B0
Q5T1J5
Q5T1V6
Q5T200
Q5T280
Q5T3I0
Q5T440
Q5T481
Q5T5J6
Q5T653
Q5T6C5
Q5T6F2
Q5T764
Q5T7N2
Q5T8I9
Q5T8P6
Q5TA45
Q5TAP6
Q5TAX3
Q5TBB1
Q5TC12
Q5TC82
Q5TEJ8
Q5TGY3
Q5U5Q3
Q5UIP0
Q5VT52
Q5VTE0
Q5VTE6
Q5VTL8
Q5VTQ0
Q5VTR2
Q5VU13
Q5VV67
Q5VVQ6
Q5VWQ0
Q5VWX1
Q5VYS8
Q5VZ19
Q5VZF2
Q5W0B1
Q5XG87
Q5XUX0
Q63ZY6
Q64LD2
Q658K8
Q659C4
Q66K41
Q66K89
Q66PJ3
Q67FW5
Q68CQ4
Q68D10
Q68DX3
Q68E01
Q69383
Q69YH5
Q69YN2
Q69YN4
Q6AI08
Q6AW86
Q6DKI1
Q6DKK2
Q6E0U4
Q6GMV3
Q6I9Y2
Q6IAN0
Q6IBS0
Q6IEG0
Q6IMN6
Q6IN84
Q6IPR3
Q6IQ21
Q6IS14
Q6L8Q7
Q6MZZ7
Q6N021
Q6N069
Q6NSI4
Q6NSZ9
Q6NT04
Q6NTF7
Q6NUN9
Q6NUQ4
Q6NVV1
Q6NVY1
Q6NW29
Q6NW34
Q6NWY9
Q6NXG1
Q6NYC1
Q6NZI2
Q6NZY4
Q6P087
Q6P158
Q6P161
Q6P1L8
Q6P1Q9
Q6P1R4
Q6P1X6
Q6P2E9
Q6P2I3
Q6P2Q9
Q6P3W6
Q6P589
Q6P5R6
Q6P5S7
Q6P6C2
Q6P9B9
Q6PCB5
Q6PEV8
Q6PF06
Q6PF18
Q6PGN9
Q6PI26
Q6PI47
Q6PI48
Q6PI98
Q6PID6
Q6PIY7
Q6PJT7
Q6PK04
Q6PKG0
Q6PL24
Q6PUV4
Q6QN14
Q6RFH5
Q6UB28
Q6UN15
Q6UX04
Q6UXG2
Q6V1X1
Q6WKZ4
Q6XE24
Q6Y2X3
Q6Y7W6
Q6YP21
Q6ZMN8
Q6ZN04
Q6ZN17
Q6ZN18
Q6ZN30
Q6ZN55
Q6ZP01
Q6ZP80
Q6ZRV2
Q6ZRY4
Q6ZSC3
Q6ZSY5
Q6ZT89
Q6ZTR5
Q6ZU64
Q6ZU80
Q6ZUT1
Q6ZUT6
Q6ZW31
Q6ZW49
Q6ZWL3
Q702N8
Q71F23
Q71RC2
Q71UM5
Q75QN2
Q75VX8
Q76FK4
Q76MJ5
Q7KZ85
Q7KZF4
Q7KZI7
Q7L014
Q7L0Y3
Q7L1Q6
Q7L2E3
Q7L2H7
Q7L2J0
Q7L2Z9
Q7L3S4
Q7L3T8
Q7L4I2
Q7L576
Q7L775
Q7L7V1
Q7L8L6
Q7LFL8
Q7LFX5
Q7RTS1
Q7RTV0
Q7Z2E3
Q7Z2T5
Q7Z2W4
Q7Z2W9
Q7Z2Z2
Q7Z304
Q7Z333
Q7Z3E1
Q7Z3V5
Q7Z3Z3
Q7Z3Z4
Q7Z406
Q7Z417
Q7Z422
Q7Z478
Q7Z4G4
Q7Z4V5
Q7Z5J4
Q7Z5L2
Q7Z5M8
Q7Z5P4
Q7Z5Q1
Q7Z5R6
Q7Z5U6
Q7Z5W3
Q7Z628
Q7Z6E9
Q7Z6J9
Q7Z6K3
Q7Z6M4
Q7Z6V5
Q7Z6Z6
Q7Z6Z7
Q7Z739
Q7Z7A3
Q7Z7F0
Q7Z7F7
Q7Z7H8
Q7Z7K6
Q7Z7L1
Q86SE5
Q86SE8
Q86SG3
Q86SQ7
Q86TB9
Q86TG7
Q86TI0
Q86TL0
Q86TM3
Q86TN4
Q86TS9
Q86TU7
Q86U06
Q86U38
Q86U42
Q86U44
Q86U90
Q86UA1
Q86UE4
Q86UK7
Q86UP2
Q86UQ0
Q86UR5
Q86US8
Q86UT8
Q86UW6
Q86V81
Q86VM9
Q86VP6
Q86VV4
Q86W42
Q86W50
Q86WA6
Q86WB0
Q86WV5
Q86WV6
Q86WX3
Q86X02
Q86X27
Q86X40
Q86XE3
Q86XF0
Q86XN7
Q86XN8
Q86XP3
Q86XZ4
Q86Y13
Q86Y79
Q86YF9
Q86YI8
Q86YN6
Q86YT5
Q86YV6
Q8IU60
Q8IUE6
Q8IUF8
Q8IUH3
Q8IUW3
Q8IUX4
Q8IV42
Q8IV48
Q8IVH2
Q8IVH4
Q8IVS2
Q8IVW4
Q8IWA0
Q8IWA5
Q8IWA6
Q8IWD4
Q8IWR0
Q8IWS0
Q8IWX8
Q8IWZ3
Q8IWZ8
Q8IX01
Q8IX12
Q8IX18
Q8IXH7
Q8IXM3
Q8IXQ4
Q8IXQ9
Q8IXT5
Q8IXW5
Q8IXZ2
Q8IY21
Q8IY37
Q8IY67
Q8IY81
Q8IYB1
Q8IYB3
Q8IYB7
Q8IYB8
Q8IYD1
Q8IYG6
Q8IYL2
Q8IYR2
Q8IYS8
Q8IYT2
Q8IYX4
Q8IYY4
Q8IZ69
Q8IZ73
Q8IZD4
Q8IZH2
Q8IZL8
Q8IZP1
Q8IZP6
Q8IZQ5
Q8IZU1
Q8N0S6
Q8N0T1
Q8N0W7
Q8N0Z8
Q8N128
Q8N163
Q8N1G1
Q8N1G2
Q8N1G4
Q8N1V2
Q8N1V8
Q8N1W1
Q8N201
Q8N2A8
Q8N2G6
Q8N2M8
Q8N3C0
Q8N3J3
Q8N3X1
Q8N3Z3
Q8N3Z6
Q8N427
Q8N442
Q8N443
Q8N475
Q8N4C8
Q8N4J0
Q8N4S7
Q8N4T4
Q8N4W9
Q8N567
Q8N5A5
Q8N5C6
Q8N5F7
Q8N5I9
Q8N5K1
Q8N5L8
Q8N5N7
Q8N5P1
Q8N5U6
Q8N5X7
Q8N5Y2
Q8N684
Q8N6C8
Q8N6N3
Q8N6U8
Q8N6W0
Q8N6Y1
Q8N726
Q8N7K0
Q8N7W2
Q8N7X1
Q8N8A6
Q8N8D1
Q8N8M0
Q8N8N7
Q8N8Q3
Q8N8S7
Q8N8U3
Q8N8V2
Q8N954
Q8N983
Q8N9I0
Q8N9M1
Q8N9M5
Q8N9N2
Q8N9N8
Q8N9Q2
Q8N9T8
Q8N9W6
Q8NA56
Q8NA58
Q8NAF0
Q8NAP3
Q8NAT2
Q8NAV1
Q8NB50
Q8NBJ9
Q8NBP7
Q8NBS9
Q8NBZ0
Q8NC51
Q8NC60
Q8NCA5
Q8NCD3
Q8NCE0
Q8NCI6
Q8NCM8
Q8NCQ5
Q8NCV1
Q8ND04
Q8ND56
Q8ND71
Q8NDD1
Q8NDF8
Q8NDG6
Q8NDT2
Q8NDV7
Q8NE18
Q8NE22
Q8NE35
Q8NE62
Q8NE71
Q8NEF9
Q8NEJ9
Q8NEQ5
Q8NET4
Q8NEY8
Q8NEZ4
Q8NF91
Q8NFW8
Q8NFZ3
Q8NG08
Q8NG48
Q8NG50
Q8NHM5
Q8NHP7
Q8NHQ9
Q8NHS2
Q8NHU6
Q8NI27
Q8NI36
Q8TA86
Q8TAA1
Q8TAA9
Q8TAD8
Q8TAE8
Q8TAK5
Q8TAP9
Q8TAQ5
Q8TAS1
Q8TB72
Q8TBB1
Q8TBF4
Q8TBG4
Q8TBY0
Q8TBZ6
Q8TC59
Q8TC92
Q8TCC3
Q8TCS8
Q8TD47
Q8TD90
Q8TDB6
Q8TDD1
Q8TDE3
Q8TDN6
Q8TDP1
Q8TE67
Q8TE96
Q8TEA1
Q8TED0
Q8TEM1
Q8TEQ6
Q8TEV9
Q8TEX9
Q8TF01
Q8TF32
Q8TF39
Q8TF46
Q8TF50
Q8TF76
Q8WTP8
Q8WTR7
Q8WTS6
Q8WTT2
Q8WU43
Q8WU68
Q8WU90
Q8WUA2
Q8WUA4
[truncated: 3,022 more rows]
